# Supplementary material
Source: publisher figshare collection journal article supplement (https://tandf.figshare.com/ndownloader/files/22684625)
Supplement: Supplementary file 1 [file 22684625]

# **Quantification of relationship between annual daily maximum temperature and annual daily maximum rainfall in South Australia**

Qianping YE and Faisal AHAMMED

School of Natural and Built Environments, University of South Australia, Adelaide, Australia

## **ARTICLE HISTORY**

Received 8 October 2019

Revised 6 November 2019

Accepted 11 November 2019

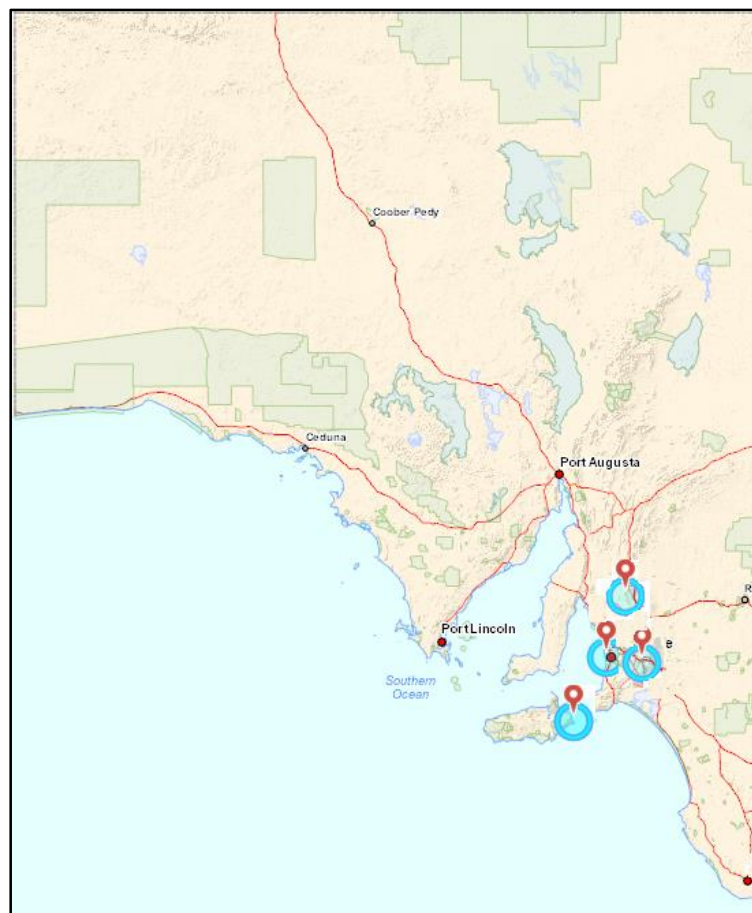

**Figure S1** Selected weather stations.
